# Supplementary material for: Self-assembly of arene ruthenium acylpyrazolone fragments to tetranuclear metallacycles. Molecular structures and solid-state 15N CPMAS NMR correlations
Source: Royal Society of Chemistry journal article supplement (doi:10.1039/c6dt00168h), 2016-01-01
Supplement: c6dt00168h1.pdf [file c6dt00168h1.pdf]

Electronic Supplementary Material (ESI) for Dalton Transactions.  
This journal is © The Royal Society of Chemistry 2016

## Supplementary Information

### Self-Assembly of Arene Ruthenium Acylpyrazolone Fragments to Tetranuclear Metallacycles. Molecular Structures and Solid-State <sup>15</sup>N CPMAS NMR Correlations.

Riccardo Pettinari,<sup>a\*</sup> Fabio Marchetti,<sup>b</sup> Claudio Pettinari,<sup>a</sup> Francesca Condello,<sup>a</sup> Brian W. Skelton,<sup>c</sup> Allan H. White,<sup>d</sup> Michele Remo Chierotti<sup>e</sup> and Roberto Gobetto.<sup>e\*</sup>

[a] School of Pharmacy, University of Camerino, via S. Agostino 1, 62032 Camerino MC, Italy. E-mail: riccardo.pettinari@unicam.it; Tel: +39-0737-632338;

[b] School of Science and Technology, University of Camerino, via S. Agostino 1, 62032 Camerino MC, Italy;

[c] School of Chemistry and Biochemistry M310, The University of Western Australia, Crawley, WA 6009, Australia;

[d] Centre for Microscopy, Characterization and Analysis M010, The University of Western Australia, Crawley, WA 6009, Australia;

[e] Dipartimento di Chimica and NIS Centre, University of Torino, Via P. Giuria 7, 10125 Torino, Italy.

#### Table of content

|                                      |   |
|--------------------------------------|---|
| Crystallographic appendix            | 2 |
| Relevant <sup>19</sup> F NMR spectra | 4 |
| TGA curve                            | 8 |

## Crystallographic appendix

**Table S1.** Crystal/Refinement Data, (1), (2) and (4)

|                                                            | 1                                                                                | 4                                                                  | 2                                                                                                                                                                                                                |
|------------------------------------------------------------|----------------------------------------------------------------------------------|--------------------------------------------------------------------|------------------------------------------------------------------------------------------------------------------------------------------------------------------------------------------------------------------|
| formula                                                    | C <sub>22</sub> H <sub>24</sub> Cl <sub>2</sub> N <sub>2</sub> O <sub>2</sub> Ru | C <sub>27</sub> H <sub>35</sub> ClN <sub>2</sub> O <sub>2</sub> Ru | {[(C <sub>22</sub> H <sub>24</sub> ClN <sub>2</sub> O <sub>2</sub> Ru)] <sub>4</sub> (O <sub>3</sub> SCF <sub>3</sub> )}<br>(O <sub>3</sub> SCF <sub>3</sub> ) <sub>3</sub> CHCl <sub>3</sub> ·2H <sub>2</sub> O |
| <i>M<sub>r</sub></i> (Dal)                                 | 520.4                                                                            | 556.1                                                              | 2691.5                                                                                                                                                                                                           |
| cryst. syst.                                               | Triclinic                                                                        | Triclinic                                                          | Monoclinic                                                                                                                                                                                                       |
| space group                                                | <i>P</i> $\bar{1}$ (No.2)                                                        | <i>P</i> $\bar{1}$ (No.2)                                          | <i>C</i> 2 (No. 5)                                                                                                                                                                                               |
| <i>a</i> (Å)                                               | 7.5449(2)                                                                        | 7.8180(3)                                                          | 32.1762)                                                                                                                                                                                                         |
| <i>b</i> (Å)                                               | 12.0143(4)                                                                       | 11.5430(4)                                                         | 11.3815(4)                                                                                                                                                                                                       |
| <i>c</i> (Å)                                               | 12.9409(5)                                                                       | 14.1909(5)                                                         | 15.8038(8)                                                                                                                                                                                                       |
| $\alpha$ (deg)                                             | 112.841(4)                                                                       | 89.197(3)                                                          |                                                                                                                                                                                                                  |
| $\beta$ (deg)                                              | 95.867(3)                                                                        | 85.167(3)                                                          | 116.629(7)                                                                                                                                                                                                       |
| $\gamma$ (deg)                                             | 103.150(3)                                                                       | 77.653(3)                                                          |                                                                                                                                                                                                                  |
| <i>V</i> (Å <sup>3</sup> )                                 | 1028.27(7)                                                                       | 1246.55(8)                                                         | 5173.7(4)                                                                                                                                                                                                        |
| <i>D<sub>c</sub></i> (Z)                                   | 1.68 <sub>1</sub> (2)                                                            | 1.48 <sub>2</sub> (2)                                              | 1.72 <sub>8</sub> (2)                                                                                                                                                                                            |
| $\mu_{\text{Mo}}$ (mm <sup>-1</sup> )                      | 1.044                                                                            | 0.76                                                               | 0.93                                                                                                                                                                                                             |
| specimen (mm)                                              | 0.25,0.18,0.04                                                                   | 0.62,0.32,0.23                                                     | 0.13,0.13,0.07                                                                                                                                                                                                   |
| <i>T</i> <sub>min/max</sub>                                | 0.86                                                                             | 0.85                                                               | 0.95                                                                                                                                                                                                             |
| 2 $\theta_{\text{max}}$ (°)                                | 68.6                                                                             | 75                                                                 | 55                                                                                                                                                                                                               |
| <i>N<sub>t</sub></i>                                       | 27880                                                                            | 46395                                                              | 27740                                                                                                                                                                                                            |
| <i>N</i> ( <i>R</i> <sub>int</sub> )                       | 8240 (0.035)                                                                     | 12528 (0.029)                                                      | 11356 (0.098)                                                                                                                                                                                                    |
| <i>N<sub>o</sub></i> ( <i>I</i> >2 $\sigma$ ( <i>I</i> ))  | 7376                                                                             | 11561                                                              | 6488                                                                                                                                                                                                             |
| <i>R</i> <sub>1</sub> ( <i>I</i> >2 $\sigma$ ( <i>I</i> )) | 0.031                                                                            | 0.024                                                              | 0.074                                                                                                                                                                                                            |
| <i>wR</i> <sub>2</sub> (a,b) (all data)                    | 0.072 (0.032,0.52)                                                               | 0.060 (0.025,0.35)                                                 | 0.135 (0.060)                                                                                                                                                                                                    |
| <i>S</i>                                                   | 1.03                                                                             | 1.08                                                               | 0.95                                                                                                                                                                                                             |
| $\Delta\rho$   <sub>max</sub> (eÅ <sup>-3</sup> )          | 1.07                                                                             | 0.68                                                               | 1.49                                                                                                                                                                                                             |

**Table S2.** Selected non-hydrogen ruthenium environment geometries, **(1)**, **(2)**, **(4)**. C(0) are the ring centroids, O,N(n2,5,6) the ligating nitrogen or oxygen atoms of segments n = 1,2.

|                   | <b>1</b>              | <b>4</b>                | <b>2</b> (components 1; 2)                   |
|-------------------|-----------------------|-------------------------|----------------------------------------------|
|                   |                       | Distances (Å)           |                                              |
| Ru-C(Csub6)       | 2.149(9)<br>-2.201(2) | 2.1624(9)<br>-2.1798(9) | 2.135(8) 2.146(11)<br>-2.196(8) ; -2.202(10) |
| Ru-C(0)           | 1.653                 | 1.640                   | 1.641 ; 1.633                                |
| Ru-Cl/N           | 2.4120(4)             | 2.3968(3)               | 2.152(7) ; 2.137(8)                          |
| Ru-O(n5)          | 2.0877(11)            | 2.0835(7)               | 2.089(6) ; 2.055(6)                          |
| Ru-O(n6)          | 2.108(11)             | 2.1024(7)               | 2.099(6) ; 2.089(7)                          |
| O(n5)-C(n5)       | 1.270(2)              | 1.2732(11)              | 1.261(11); 1.232(10)                         |
| O(n6)-C(n6)       | 1.258(2)              | 1.2646(11)              | 1.235(10); 1.263(11)                         |
| C(n5)-C(n4)       | 1.424(2)              | 1.4278(11)              | 1.441(14); 1.491(15)                         |
| C(n4)-C(n6)       | 1.414(2)              | 1.4166(12)              | 1.401(13); 1.412(13)                         |
|                   |                       | Angles (degrees)        |                                              |
| C(0)-Ru-O(n5)     | 127.3                 | 127.0                   | 127.8 ; 127.4                                |
| C(0)-Ru-O(n6)     | 128.2                 | 126.0                   | 127.5 ; 124.3                                |
| C(0)-Ru-Cl/N(n2)  | 129.1                 | 129.9                   | 125.9 ; 130.9                                |
| Cl/N(n2)-Ru-O(n5) | 84.50(3)              | 85.07(2)                | 88.5(3) ; 86.6(3)                            |
| Cl/N(n2)-Ru-O(n6) | 84.63(3)              | 85.28(2)                | 87.8(9) ; 87.2(3)                            |
| O(n5)-Ru-O(n6)    | 88.25(4)              | 89.23(3)                | 86.0(2) ; 86.1(3)                            |
| Ru-O(n5)-C(n5)    | 123.07(10)            | 121.37(6)               | 123.4(6) ; 127.9(7)                          |
| Ru-O(n6)-C(n6)    | 129.13(10)            | 129.43(6)               | 132.7(6) ; 132.0(6)                          |
| Ru-N(n2)-N(n1)    | -                     | -                       | 122.5(6) ; 127.7(5)                          |
| Ru-N(n2)-C(n3)    | -                     | -                       | 135.1(6) ; 132.8(7)                          |
| N(n2)-N(n1)-C(n5) | 111.85(14)            | 112.20(3)               | 114.0(8) ; 112.0(7)                          |
| N(n1)-N(n2)-C(n3) | 106.05(11)            | 105.83(8)               | 102.4(8) ; 104.4(8)                          |

Crystallographic data for the structures reported in this paper have been deposited with the Cambridge Crystallographic Data Centre as a supplementary publication no. CCDC: 945237(**1**); 945230 (**2**); 945238 (**4**). Copies of the data can be obtained free of charge on application to CCDC, 12 Union Road, Cambridge CB21EZ, UK (fax: +(44)1223-336-033; email: [deposit@ccdc.cam.ac.uk](mailto:deposit@ccdc.cam.ac.uk)).

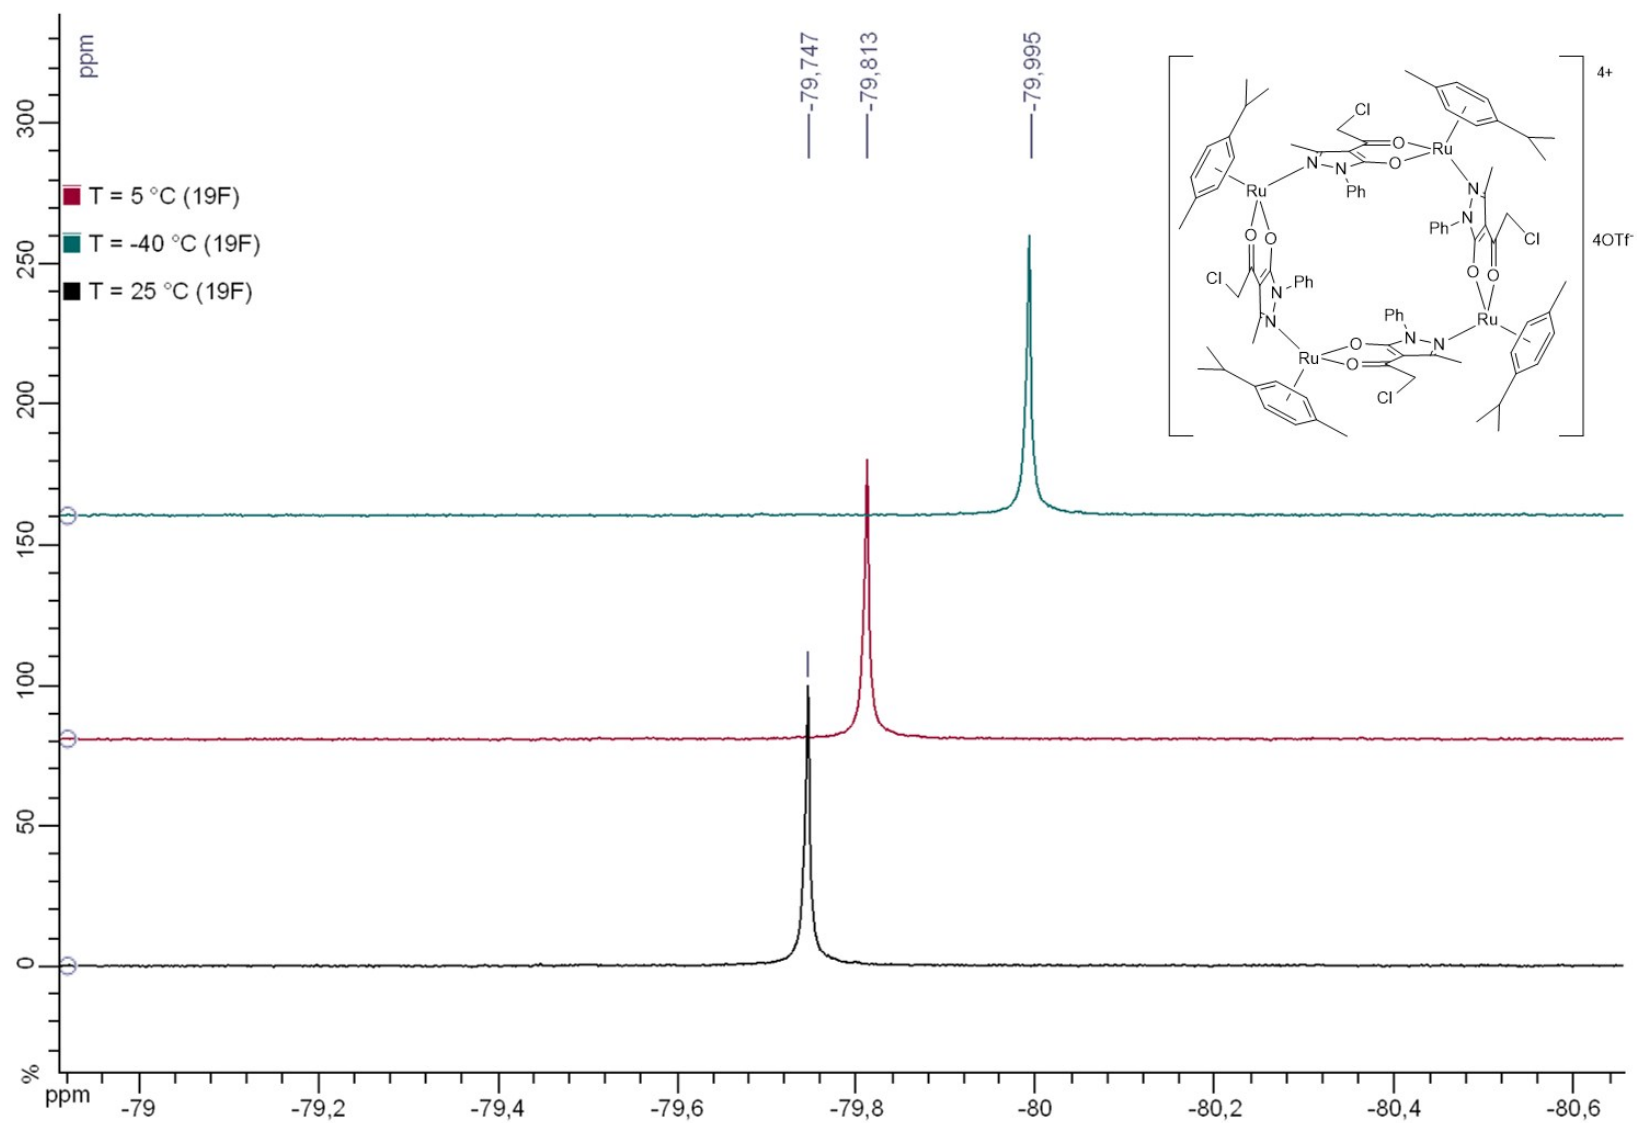

**Figure S1.** Variable temperature  $^{19}\text{F}$  NMR spectra of  $[(\eta^6\text{-cym})\text{Ru}(\text{Q}^{\text{CH}_2\text{Cl}})]_4(\text{SO}_3\text{CF}_3)_4$  (**4**) carried out in  $\text{CD}_3\text{CN}$ .

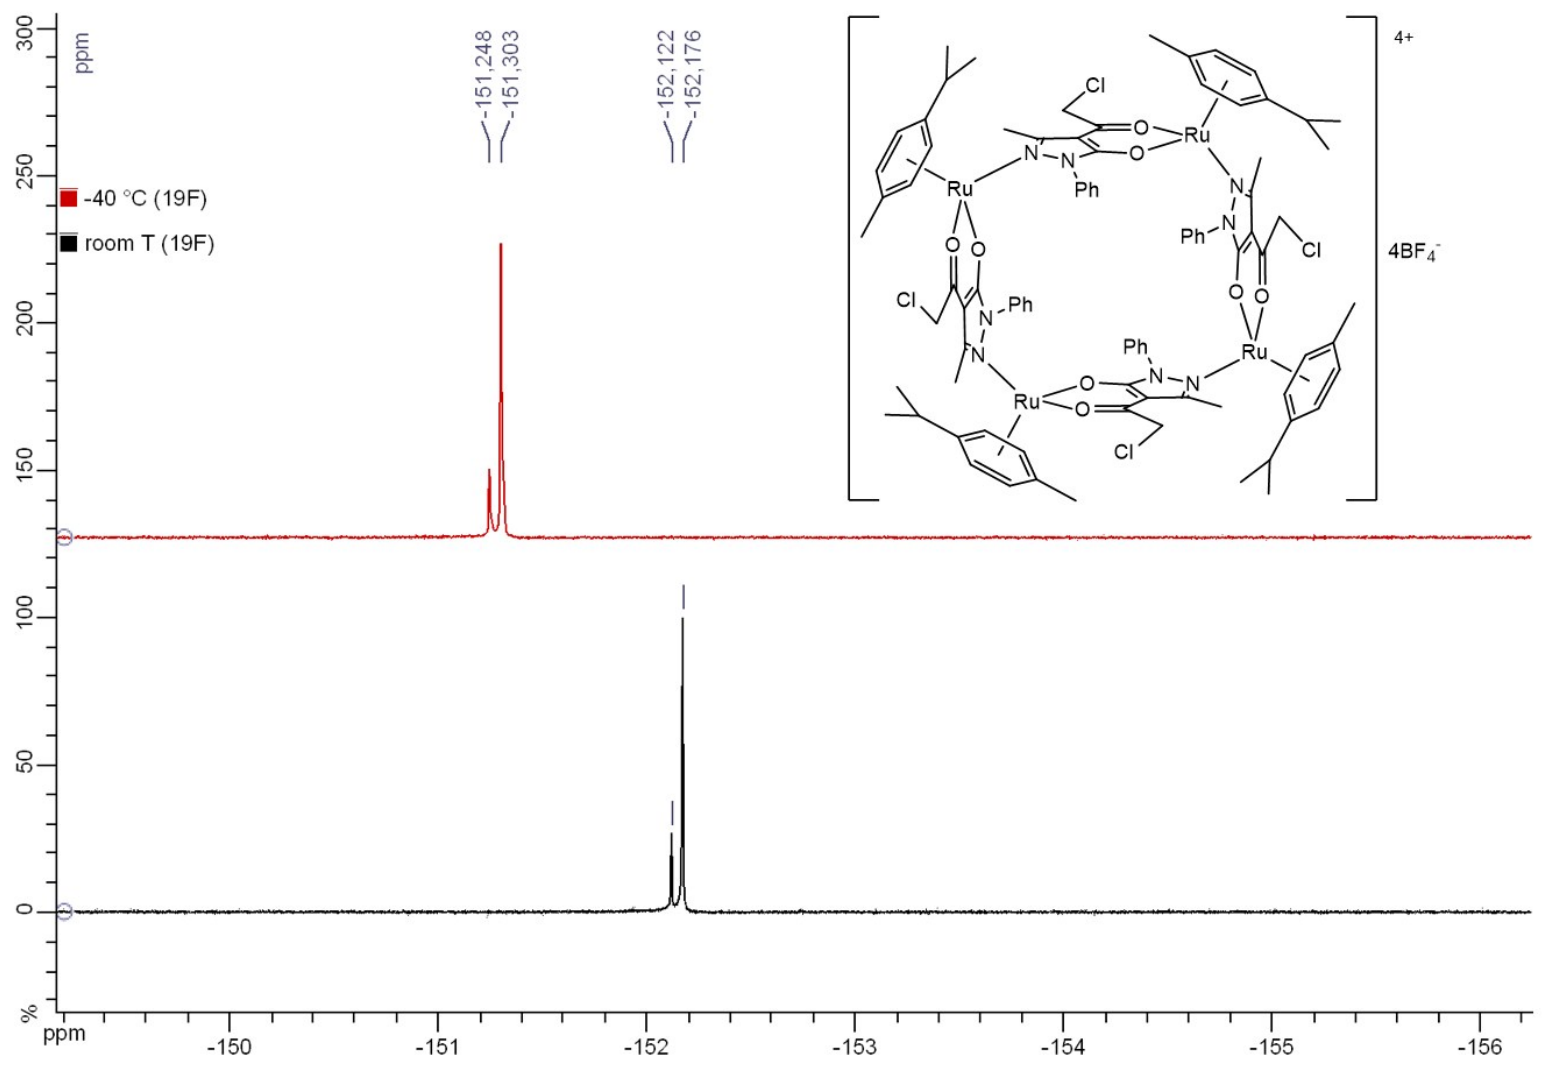

**Figure S2.** Variable temperature  $^{19}\text{F}$  NMR spectra of  $[(\eta^6\text{-cym})\text{Ru}(\text{Q}^{\text{CH}_2\text{Cl}})]_4(\text{BF}_4)_4$  (**5**) carried out in  $\text{CD}_3\text{CN}$ .

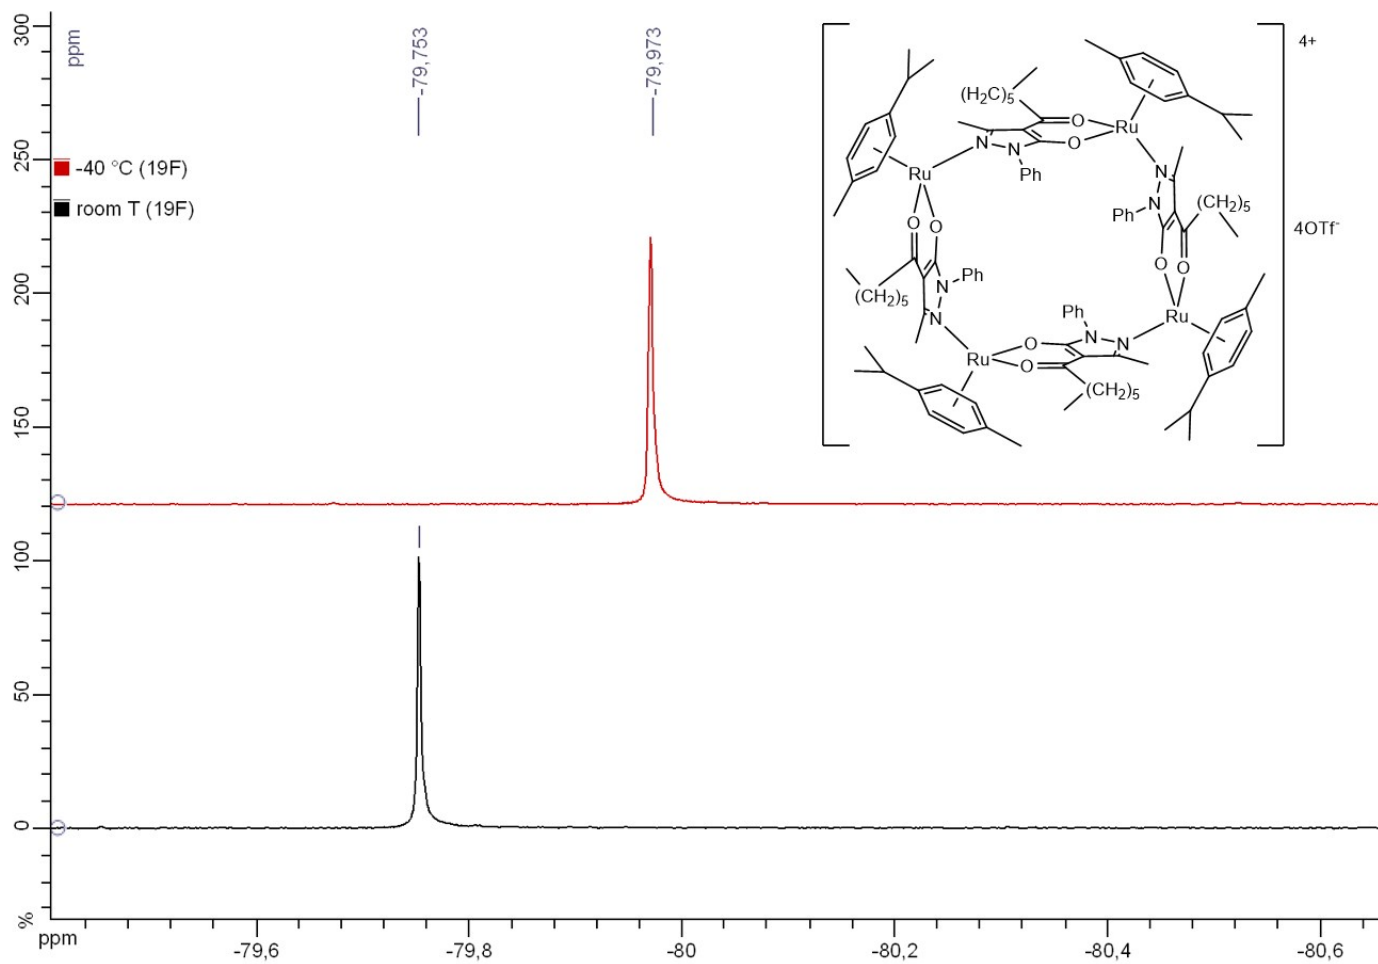

**Figure S3.** Variable temperature  $^{19}\text{F}$  NMR spectra of  $[(\eta^6\text{-cym})\text{Ru}(\text{Q}^{\text{hex}})]_4(\text{SO}_3\text{CF}_3)_4$  (**6**) carried out in  $\text{CD}_3\text{CN}$ .

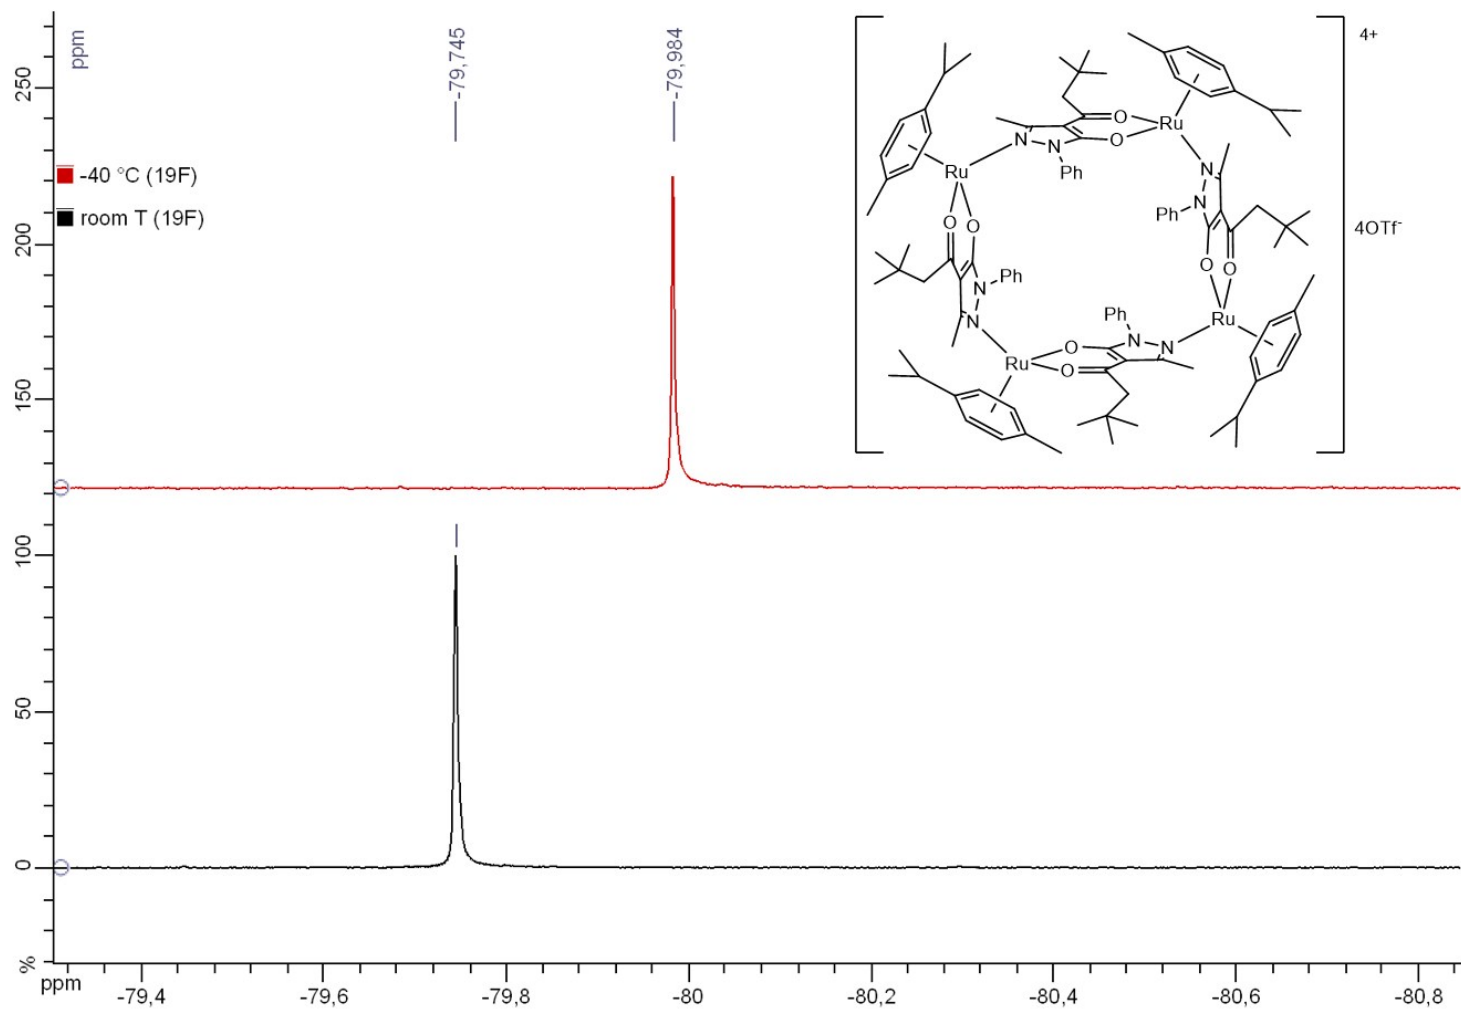

**Figure S4.** Variable temperature  $^{19}\text{F}$  NMR spectra of  $[(\eta^6\text{-cym})\text{Ru}(\text{Q}^{\text{nPe}})]_4(\text{SO}_3\text{CF}_3)_4$  (**7**) carried out in  $\text{CD}_3\text{CN}$ .

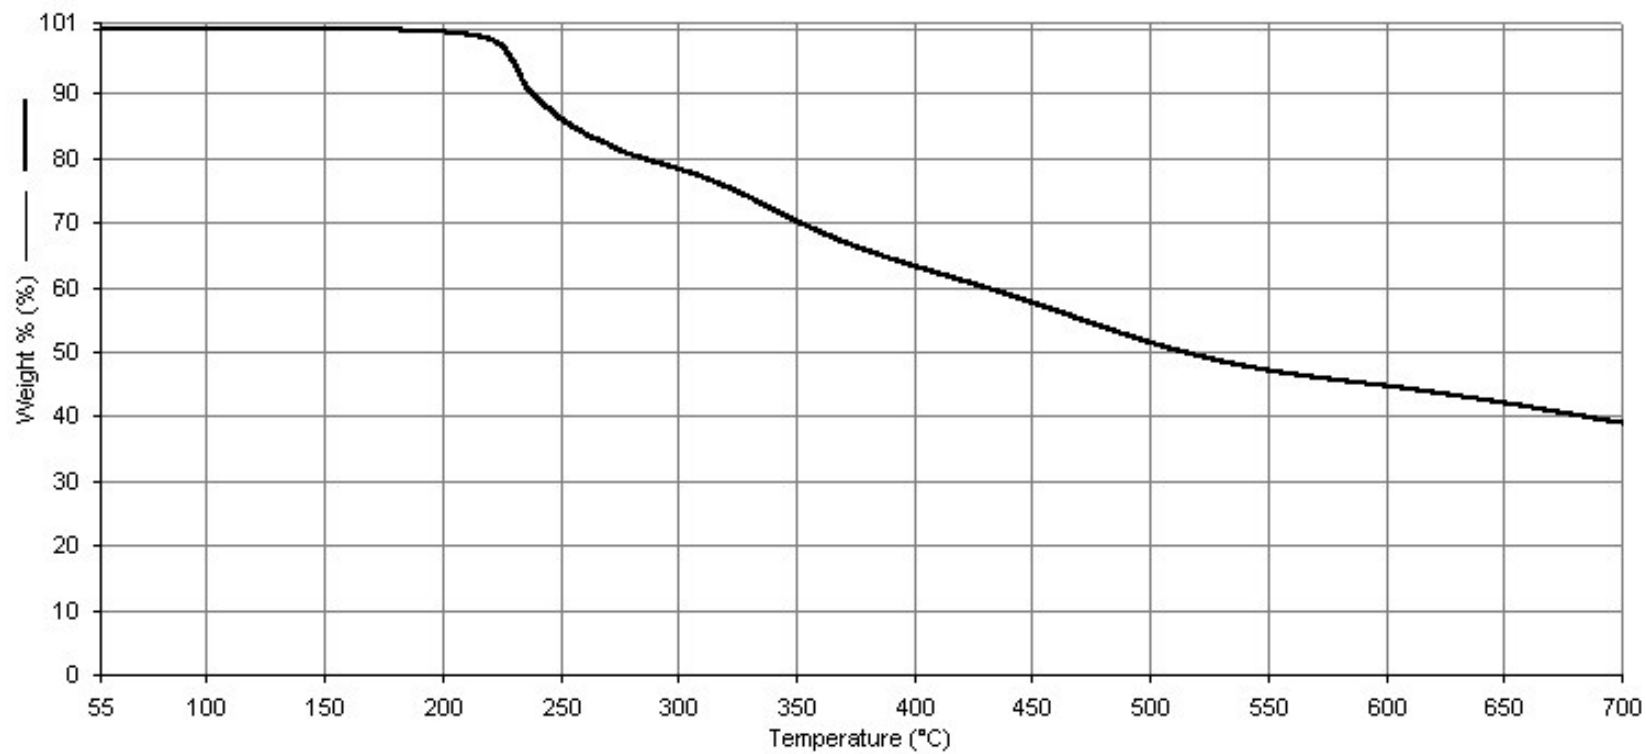

**Figure S5.** TGA of ligand HQ<sup>CH2Cl</sup>.



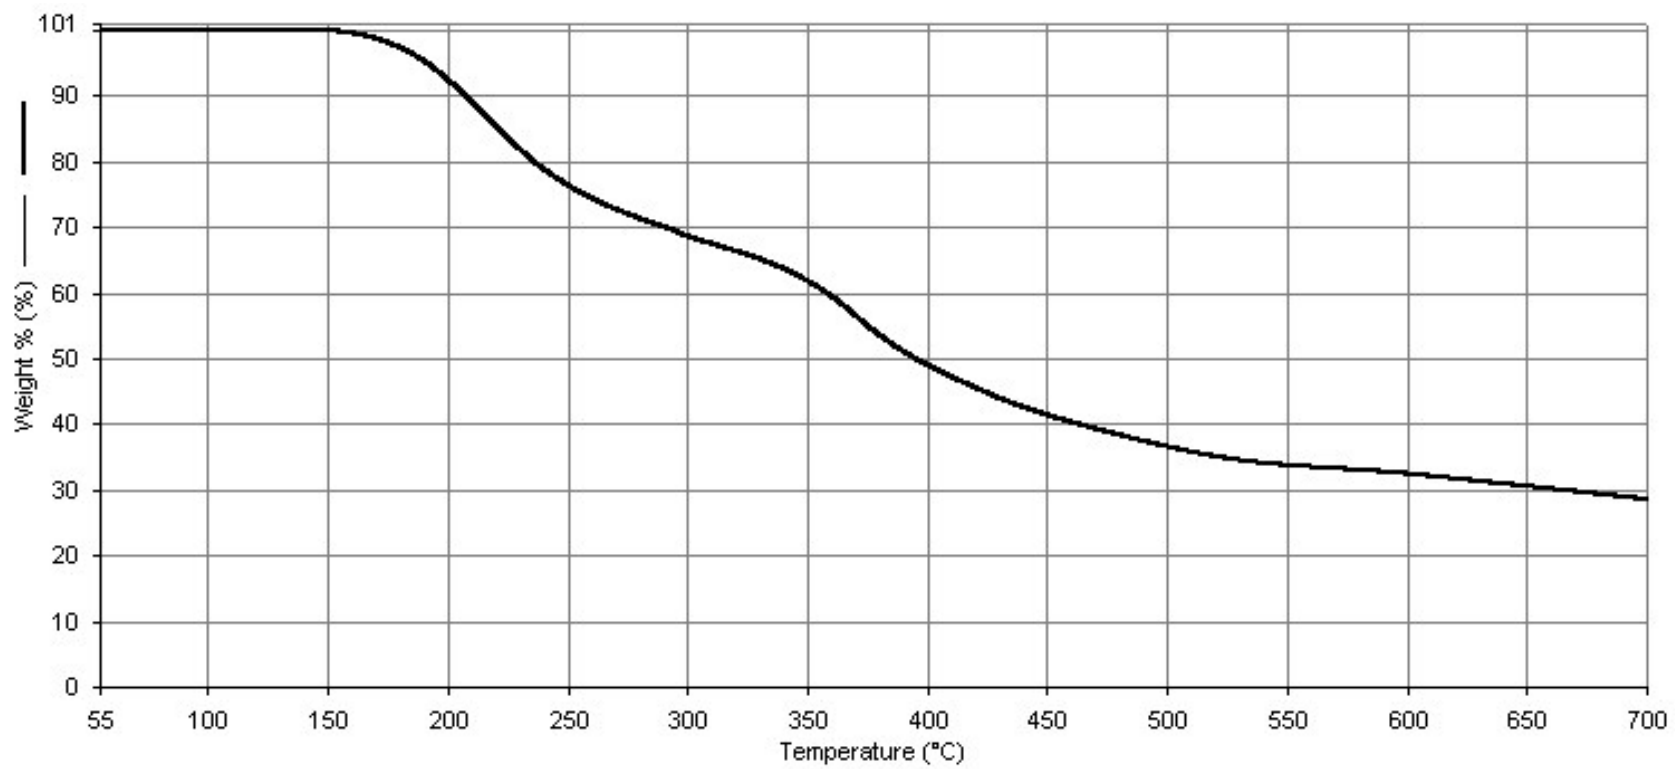

**Figure S6.** TGA of ligand HQ<sup>hex</sup>.

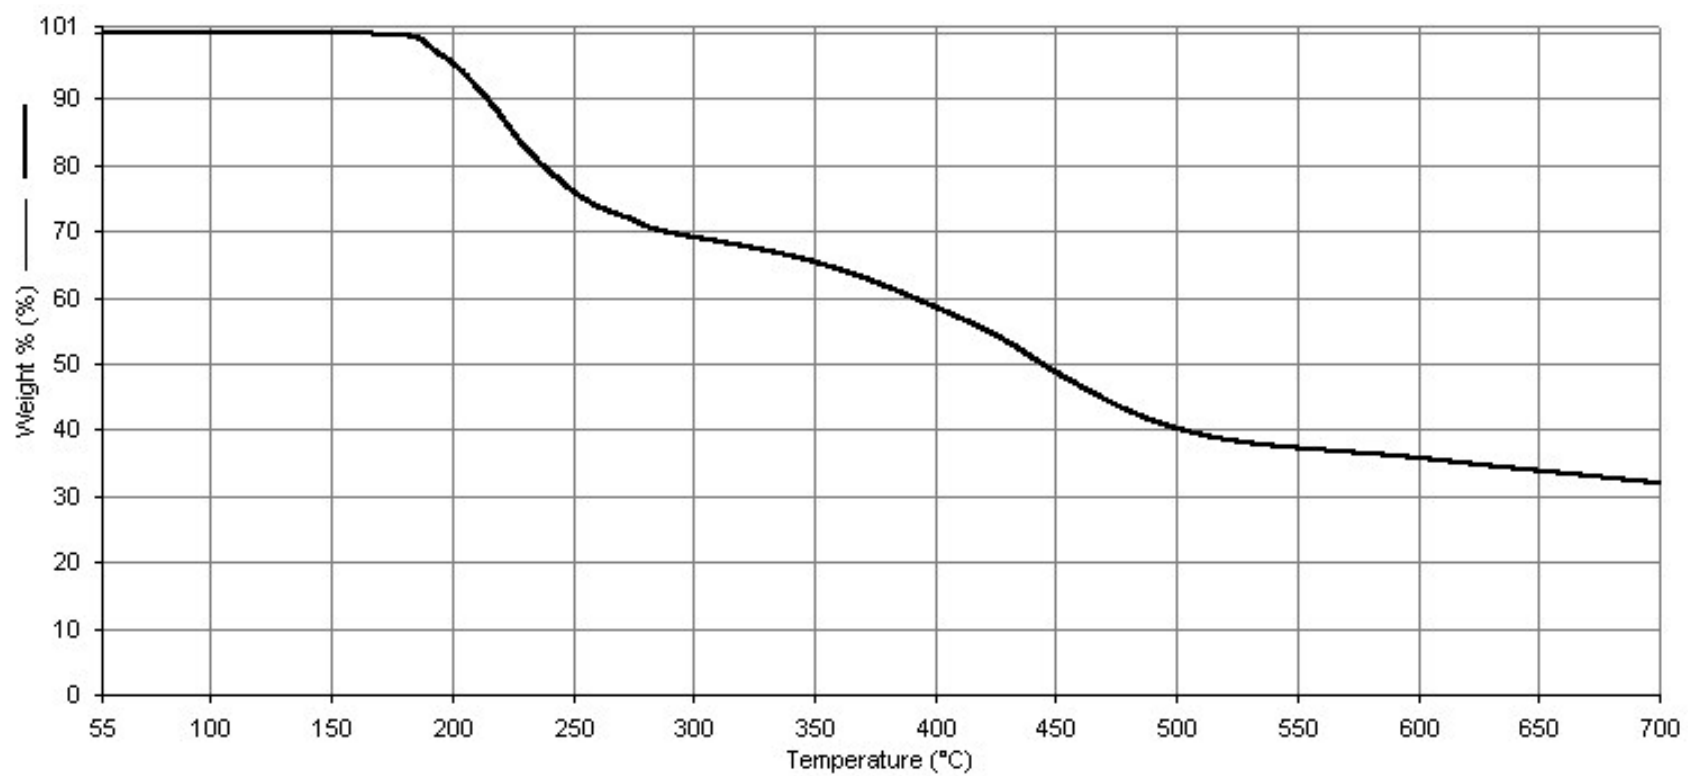

**Figure S7.** TGA of ligand HQ<sup>Pe</sup>.

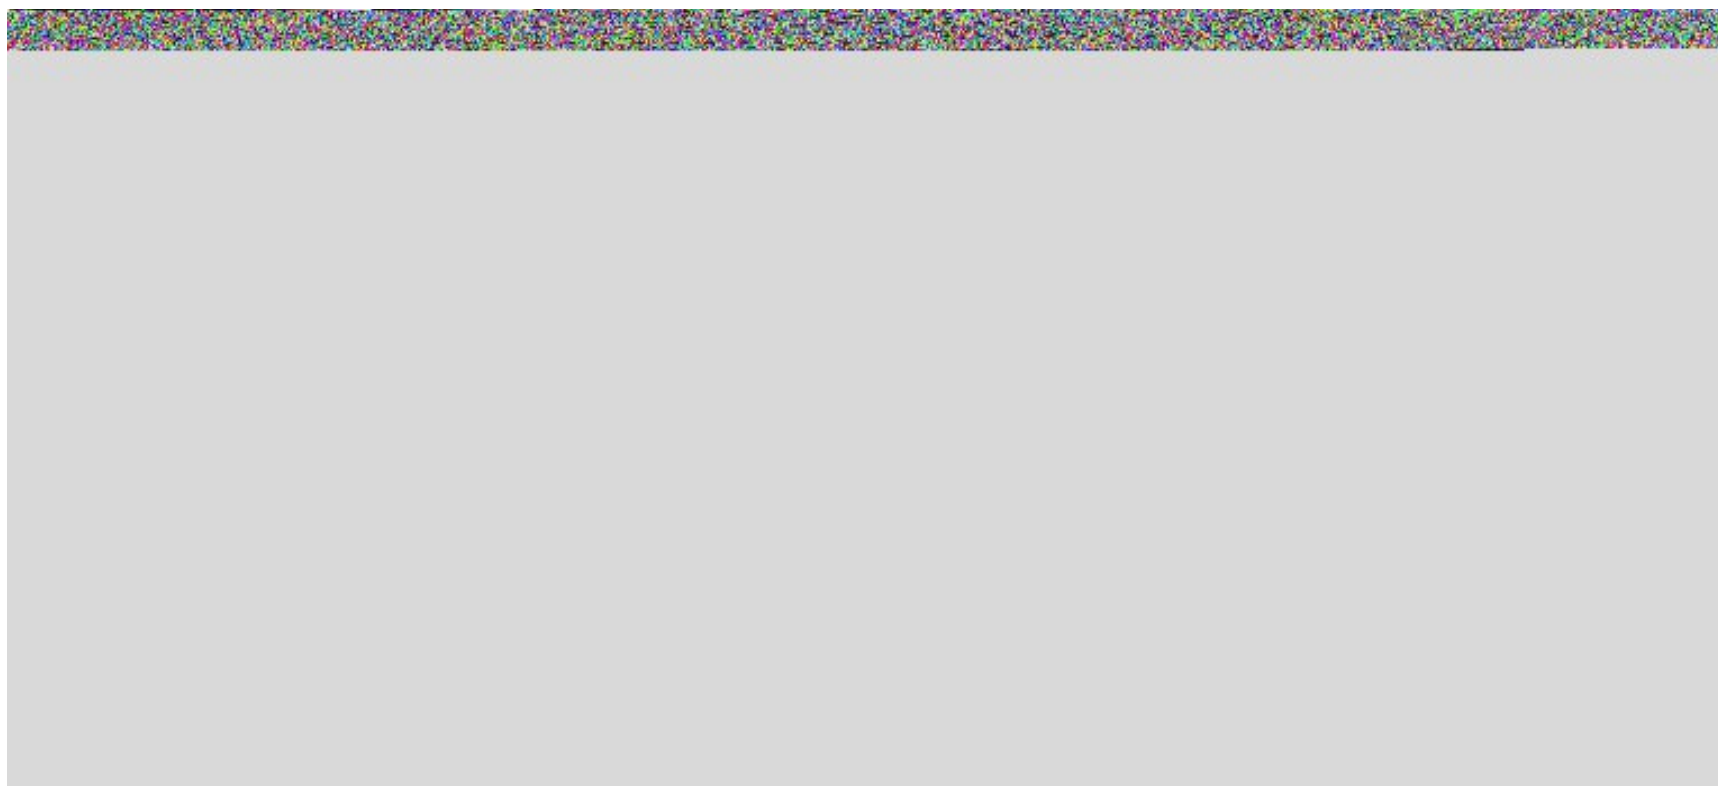

**Figure S8.** TGA of  $[(\eta^6\text{-cym})\text{Ru}(\text{Q}^{\text{CH}_2\text{Cl}})\text{Cl}]$  (**1**).

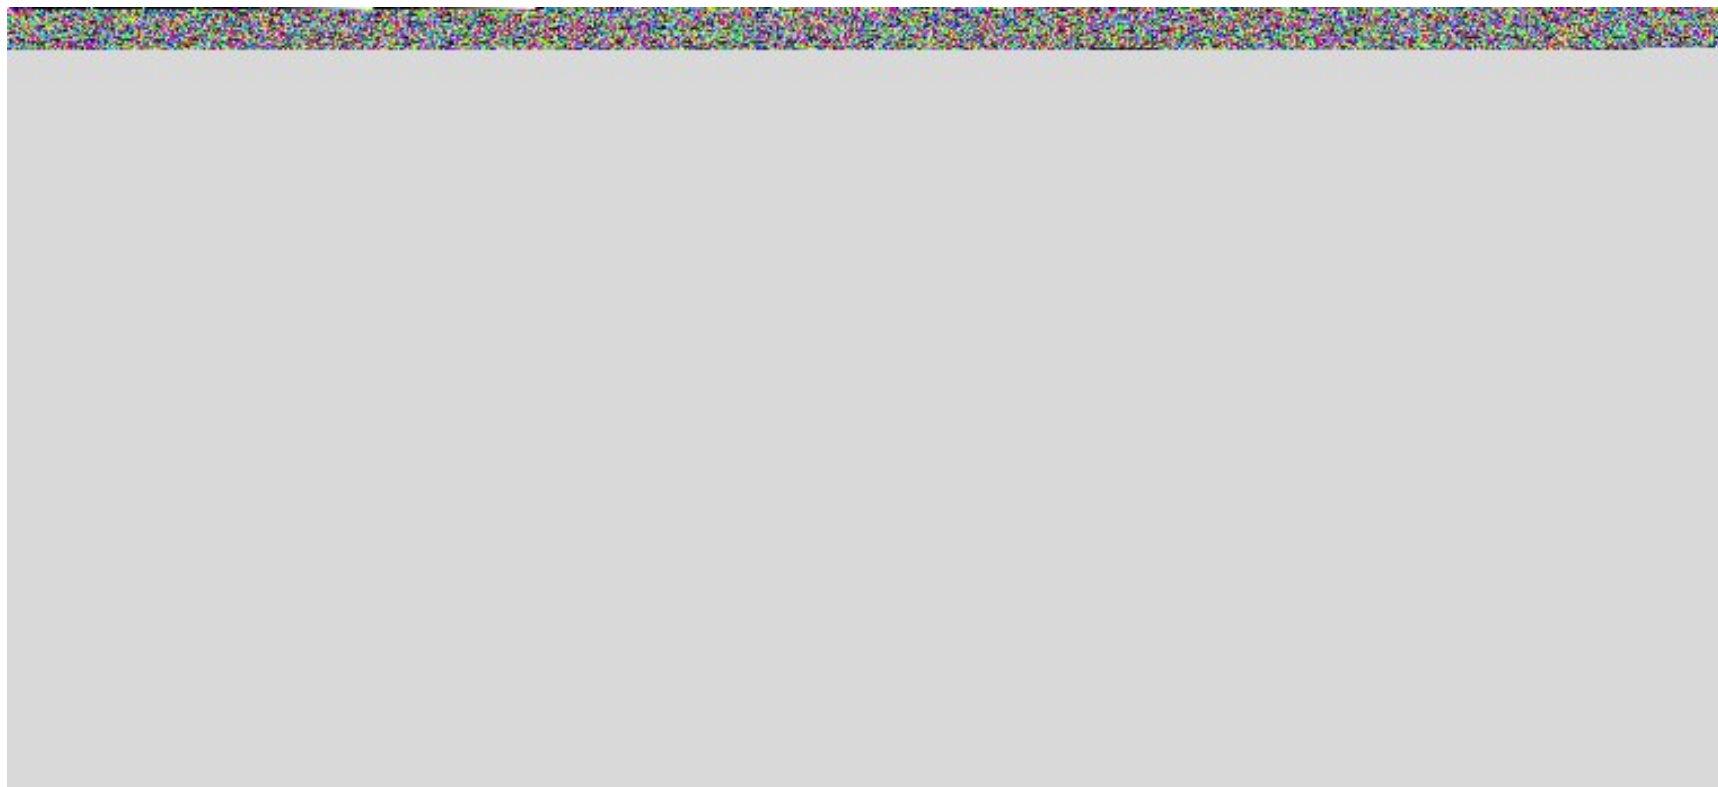

**Figure S9.** TGA of  $[(\eta^6\text{-cym})\text{Ru}(\text{Q}^{\text{hex}})\text{Cl}]$  (**2**).

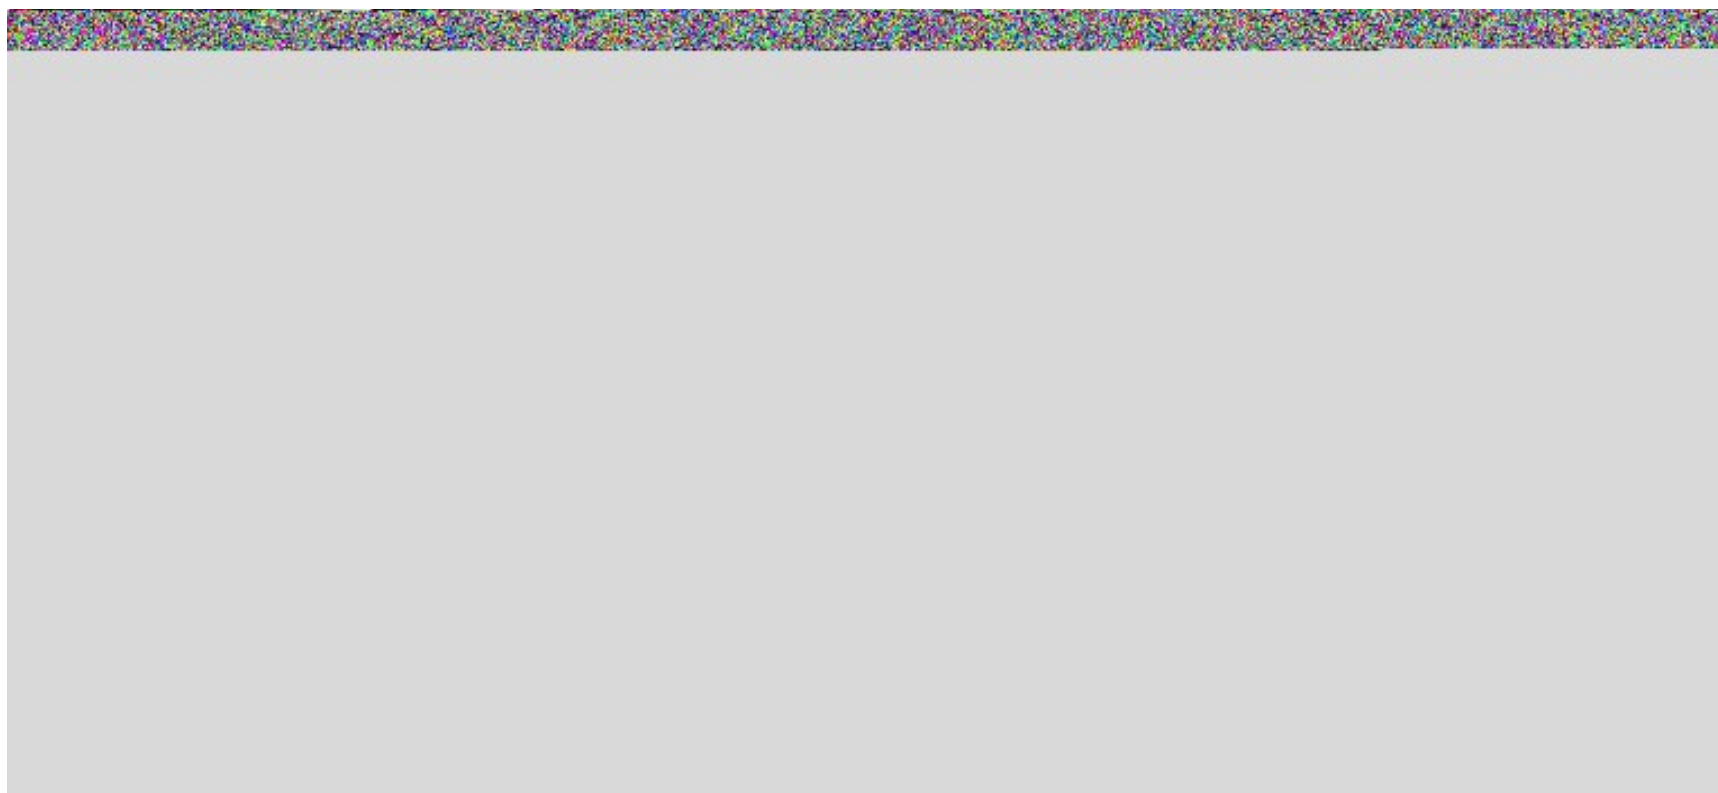

**Figure S10.** TGA of  $[(\eta^6\text{-cym})\text{Ru}(\text{Q}^{\text{nPe}})\text{Cl}]$  (**3**).

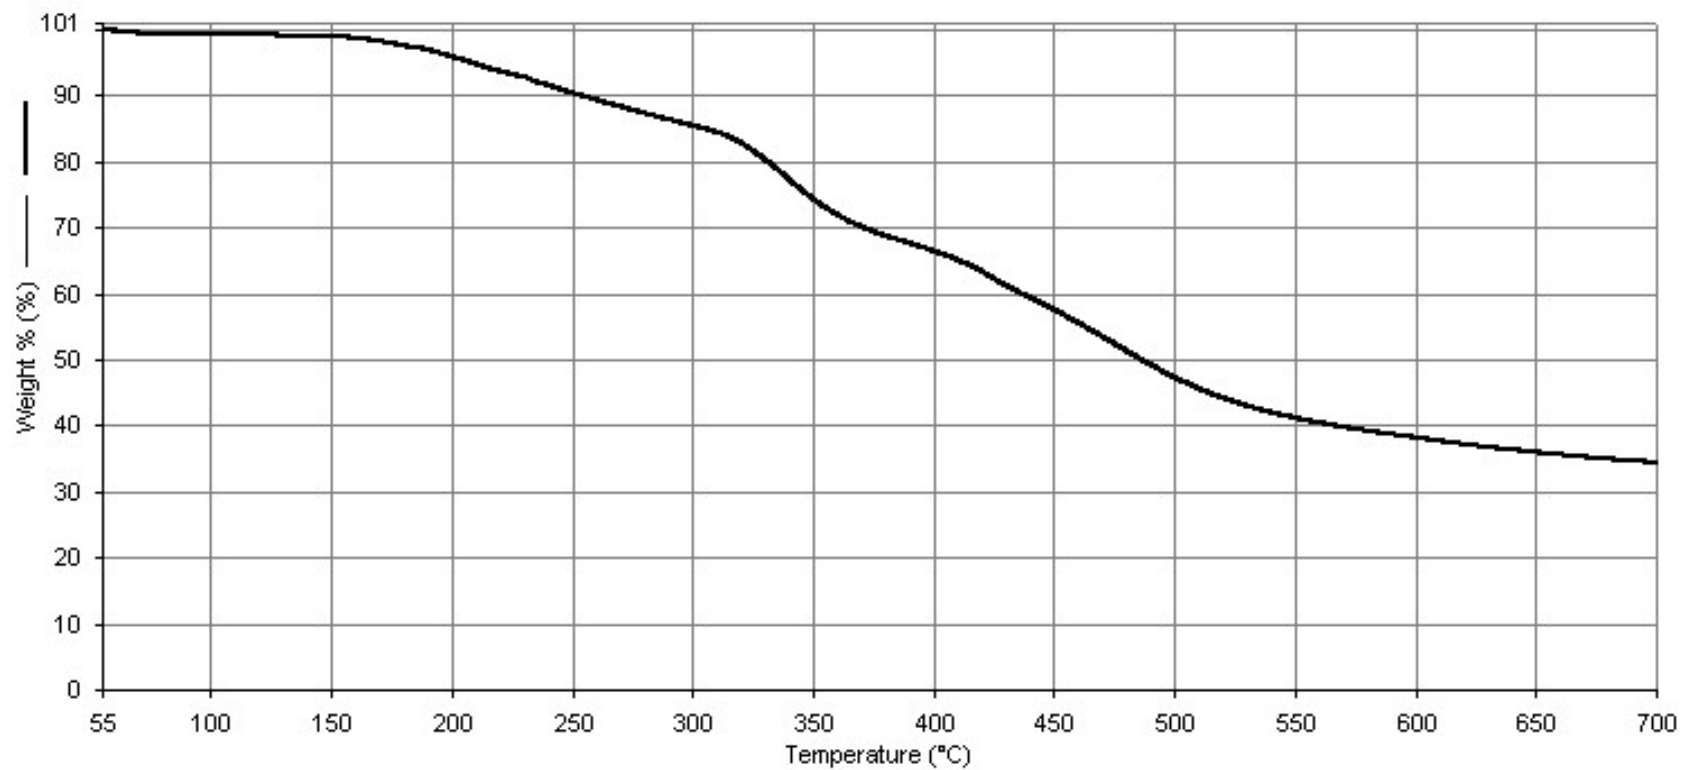

**Figure S11.** TGA of  $\{[(\eta^6\text{-cym})\text{Ru}(\text{Q}^{\text{CH}_2\text{Cl}})]_4(\text{OTf})\}(\text{OTf})_3$  (**4**).

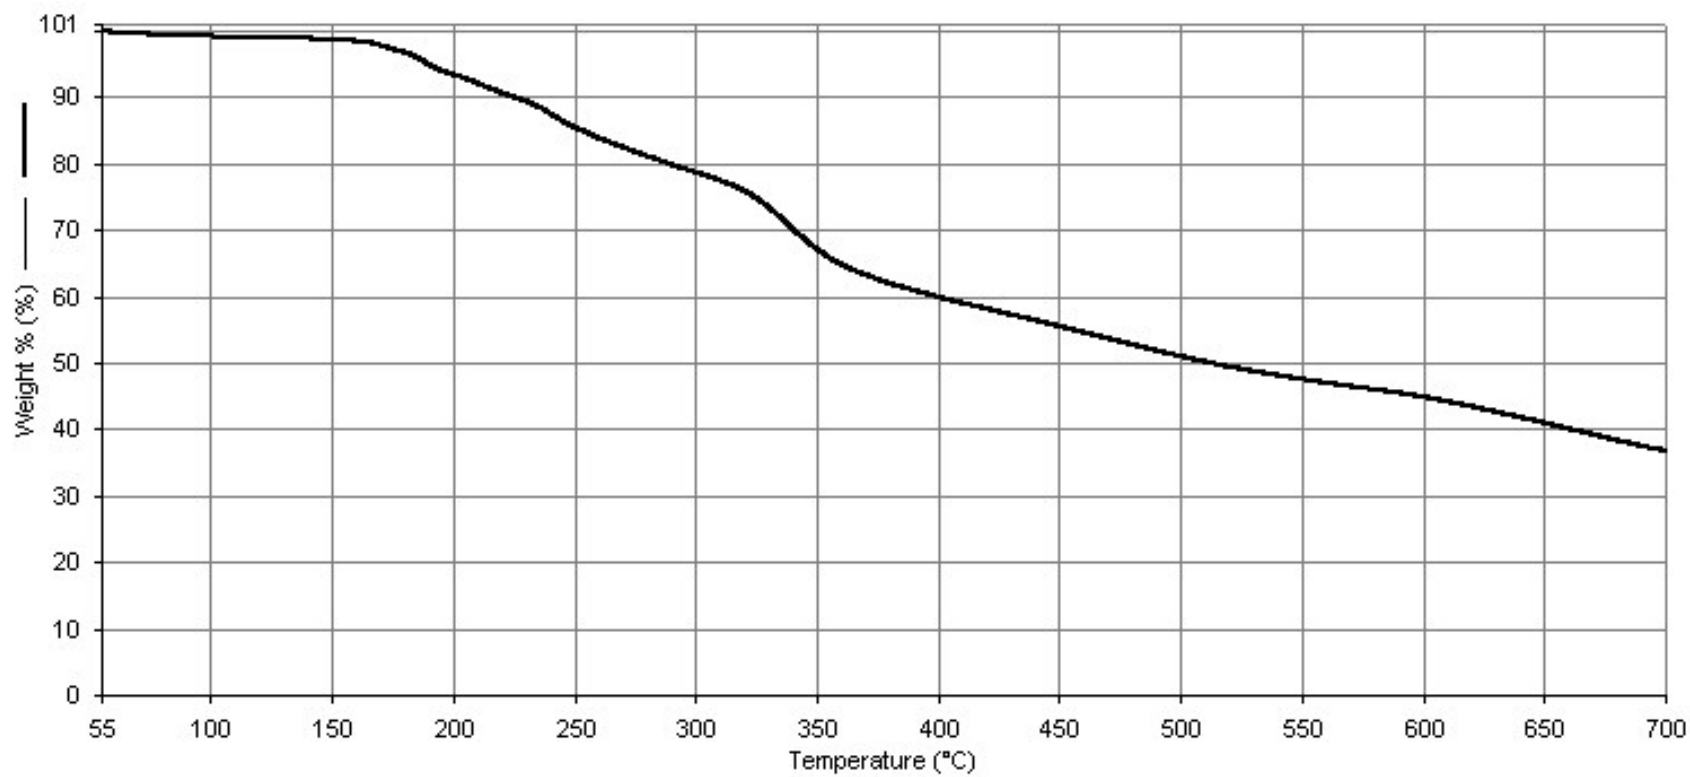

**Figure S12.** TGA of  $\{[(\eta^6\text{-cym})\text{Ru}(\text{Q}^{\text{CH}_2\text{Cl}})]_4(\text{BF}_4)\}(\text{BF}_4)_3$  (**5**).

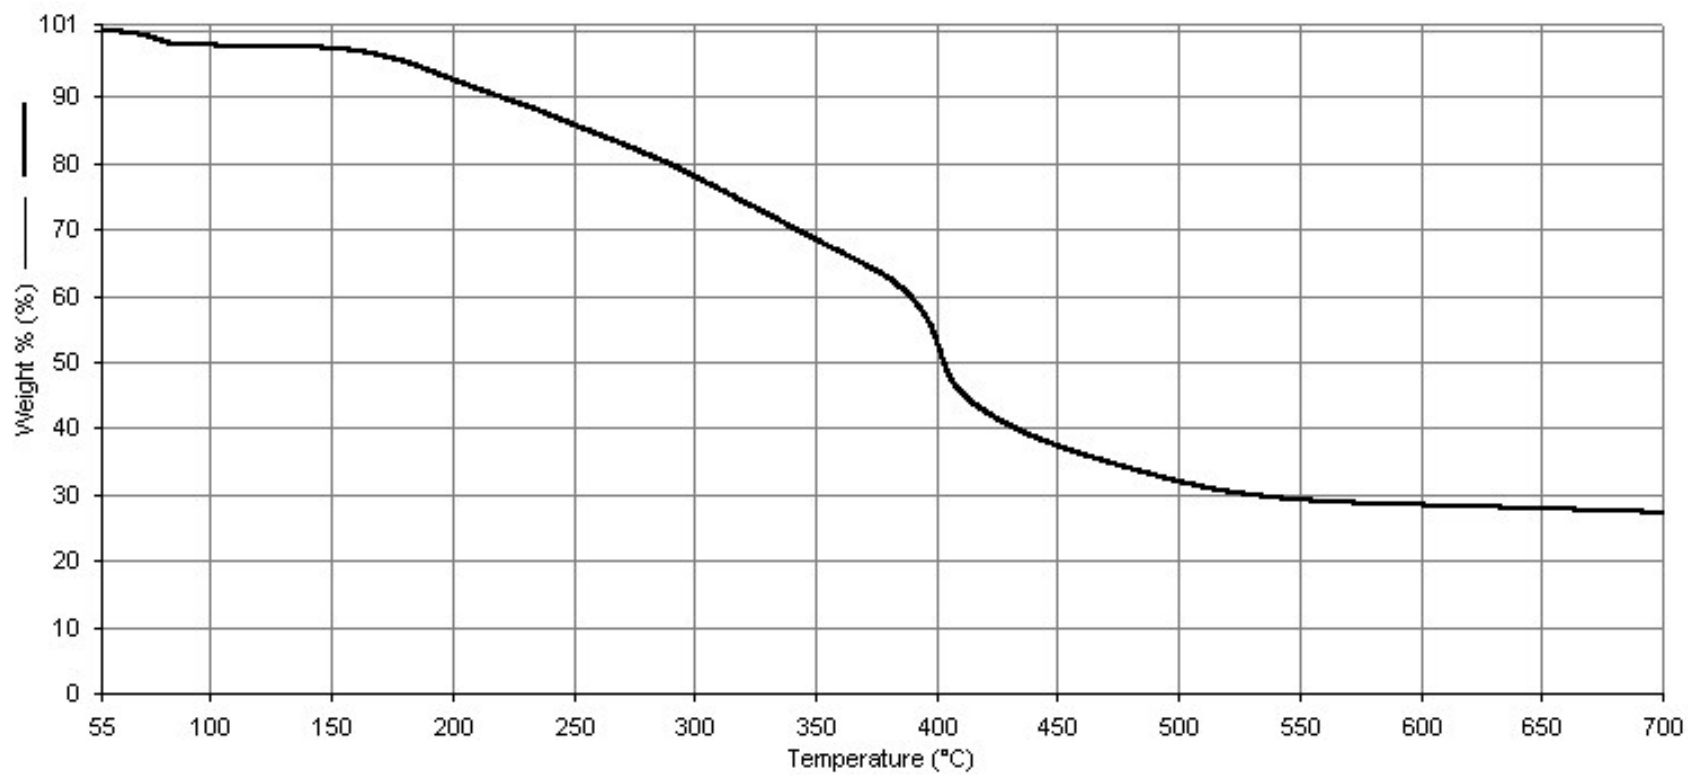

**Figure S13.** TGA of  $\{[(\eta^6\text{-cym})\text{Ru}(\text{Q}^{\text{hex}})]_4(\text{OTf})\}(\text{OTf})_3$  (**6**).



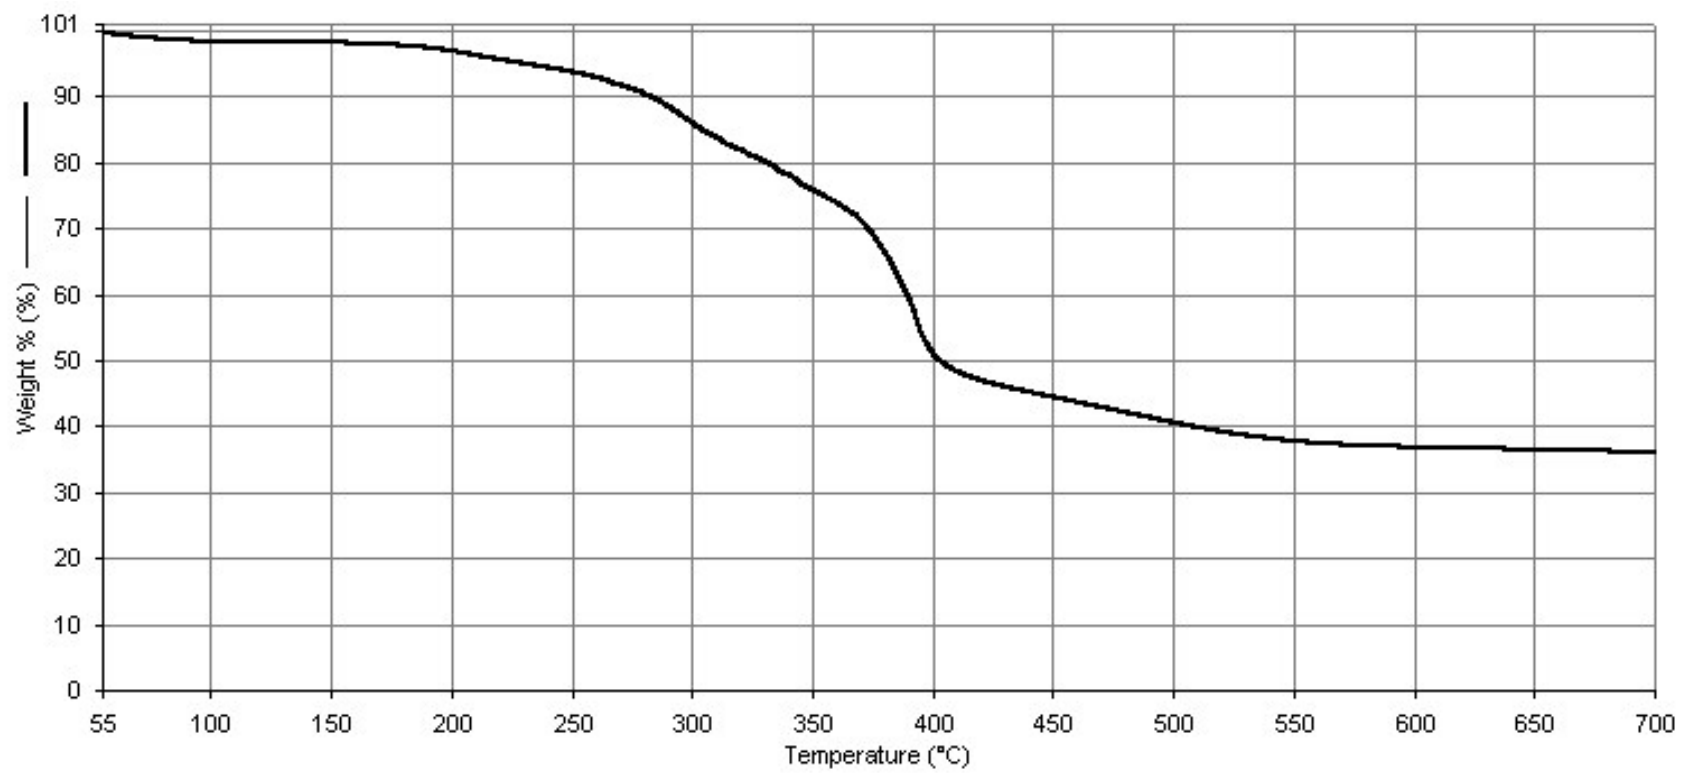

**Figure S14.** TGA of  $\{[(\eta^6\text{-cym})\text{Ru}(\text{Q}^{\text{nPe}})]_4(\text{OTf})\}(\text{OTf})_3$  (**7**).
